# Supplementary material for: Oregano Essential Oil Improves Intestinal Morphology and Expression of Tight Junction Proteins Associated with Modulation of Selected Intestinal Bacteria and Immune Status in a Pig Model
Source: Hindawi journal article supplement (doi:10.1155/2016/5436738), 2016-01-01
Supplement: f1 [file 5436738.f1.pdf]

**Table S1 - Chemical composition of oregano essential oil.**

| Components <sup>a</sup>             | Composition % |
|-------------------------------------|---------------|
| $\alpha$ -Thujene/ $\alpha$ -Pinene | 0.66          |
| Camphene                            | 0.09          |
| $\beta$ -Pinene                     | 0.07          |
| Sabinene                            | 0.04          |
| Myrcene                             | 0.86          |
| $\alpha$ -Phellandrene              | 0.08          |
| $\alpha$ -Terpinene                 | 0.58          |
| Limonene                            | 0.13          |
| 1,8-Cineole+ $\beta$ -phellandrene  | 0.09          |
| $\beta$ -Ocimene                    | 0.07          |
| $\gamma$ -Terpinene                 | 4.49          |
| 3-Octanone                          | 0.07          |
| $\rho$ -Cymene                      | 3.07          |
| Terpinolene                         | 0.04          |
| 3-Octanol                           | 0.01          |
| 1-Octen-3-ol                        | 0.24          |
| Dimethyl styrene                    | 0.01          |
| Trans-Sabinene hydrate              | 0.10          |
| Linalool                            | 0.28          |
| Cis-Sabinene hydrate                | 0.06          |
| 1-Terpilool                         | 0.04          |

---

|                        |       |
|------------------------|-------|
| Terpine-4-ol           | 0.34  |
| Carvacrol methyl ether | 0.22  |
| $\beta$ -Caryophyllene | 1.41  |
| Dihydrocarvone         | 0.08  |
| $\alpha$ -Humulene     | 0.14  |
| $\alpha$ -Terpineol    | 0.16  |
| Borneol                | 0.30  |
| $\beta$ -Bisabolene    | 0.70  |
| Caryophyllene oxide    | 0.14  |
| Thymol                 | 3.50  |
| Carvacrol              | 81.92 |
| Total                  | 99.99 |

---

<sup>a</sup> The dates were provided by Meriden Animal Health Ltd.
